# Supplementary material for: Reference Data for Diagnosis of Spondylolisthesis and Disc Space Narrowing Based on NHANES-II X-rays
Source: Bioengineering (Basel). 2024 Apr 8;11(4):360. doi: 10.3390/bioengineering11040360 (PMC11048070; doi:10.3390/bioengineering11040360)
Supplement: Supplementary file 1 [file bioengineering-11-00360-s001.zip]

Archive with 6 entries (6 files):
- File S1 - landmark placement details.pdf
- File S2 - NN for osteophyes sclerosis.pdf
- File S3 - spondyindex from flex ex.pdf
- File S4 - Errors from OOP.pdf
- File S5 - descriptive stats.pdf
- File S6 - descriptive stats NL XR.pdf
